# Supplementary material for: Nb2C MXene assisted CoNi bimetallic catalysts for hydrogenolysis of aromatic ethers
Source: Royal Society of Chemistry journal article supplement (doi:10.1039/d0se01532f), 2020-12-28
Supplement: d0se01532f1.pdf [file d0se01532f1.pdf]

## *Supporting information*

### **Nb<sub>2</sub>C MXene assisted CoNi bimetallic catalysts for hydrogenolysis of aromatic ethers**

Sen-Wang Wang,<sup>a</sup> Zhen-Hong He,<sup>b,\*</sup> Jian-Gang Chen,<sup>a</sup> Kuan Wang,<sup>b</sup> Zhong-Yu Wang,<sup>b</sup> Pan-  
Pan Guo,<sup>b</sup> Jie Lan,<sup>b</sup> Weitao Wang,<sup>b</sup> and Zhao-Tie Liu<sup>a,b,\*</sup>

<sup>a</sup>School of Chemistry & Chemical Engineering, Shaanxi Normal University, Xi'an 710119,  
China.

<sup>b</sup>Shaanxi Key Laboratory of Chemical Additives for Industry, College of Chemistry and  
Chemical Engineering, Shaanxi University of Science and Technology, Xi'an, 710021, China.

\*Corresponding authors: [hezhenhong@sust.edu.cn](mailto:hezhenhong@sust.edu.cn) (Zhen-Hong He); [ztliu@snnu.edu.cn](mailto:ztliu@snnu.edu.cn)  
(Zhao-Tie Liu)

**Table S1.** Hydrodeoxygenation of diphenyl ether over various heterogeneous catalysts.

| Entry | Catalyst                                             | T (°C) | P <sub>H<sub>2</sub></sub> (bar) | T (h) | Solv.                                                     | Conv. (%) | Ref.         |
|-------|------------------------------------------------------|--------|----------------------------------|-------|-----------------------------------------------------------|-----------|--------------|
| 1     | Ru/SBA-15                                            | 130    | 20                               | 6     | [Bmim]PF <sub>6</sub>                                     | 100       | [1]          |
| 2     | Ru/C                                                 | 120    | -                                | 10    | Isopropanol                                               | >99.0     | [2]          |
| 3     | Pd(OH) <sub>2</sub> /C                               | 160    | 1                                | 24    | <i>m</i> -Xylene + H <sub>2</sub> O                       | >99.0     | [3]          |
| 4     | Pd                                                   | 130    | 50                               | 10    | [Bmim]PF <sub>6</sub> +<br>H <sub>3</sub> PO <sub>4</sub> | >99.0     | [4]          |
| 5     | Pd/C+HZSM-5                                          | 200    | 50                               | 2     | H <sub>2</sub> O                                          | 100       | [5]          |
| 6     | Pd/HY                                                | 200    | 34                               | 1     | Decalin                                                   | >98.0     | [6]          |
| 7     | Pd/C                                                 | 200    | 40                               | 48    | Methanol                                                  | 92.0      | [7]          |
| 8     | RuPd <sub>5</sub> /NH <sub>2</sub> -SiO <sub>2</sub> | 110    | 10                               | 1     | H <sub>2</sub> O                                          | 99        | [8]          |
| 9     | Ru <sub>15</sub> Ni <sub>85</sub>                    | 95     | 1                                | 16    | H <sub>2</sub> O                                          | 99        | [9]          |
| 10    | Ru/MMT@IL-SO <sub>3</sub> H                          | 200    | 50                               | 2     | H <sub>2</sub> O                                          | 100       | [10]         |
| 11    | Ni <sub>7</sub> Au <sub>3</sub>                      | 100    | 10                               | 5     | H <sub>2</sub> O                                          | 33.7      | [11]         |
| 12    | Pd/Ni                                                | 240    | N <sub>2</sub> 10                | 1.5   | 2-Propanol                                                | 96        | [12]         |
| 13    | RuCo/CeO <sub>2</sub>                                | 200    | 20                               | -     | Decalin                                                   | 100       | [13]         |
| 14    | RuFe/CeO <sub>2</sub>                                | 200    | 20                               | -     | Decalin                                                   | 100       | [14]         |
| 15    | Ni@SiC                                               | 120    | 6                                | 20    | H <sub>2</sub> O                                          | 99        | [15]         |
| 16    | Ni@IRMOF-74(II)                                      | 120    | 10                               | 16    | <i>p</i> -Xylene                                          | 96        | [16]         |
| 17    | Ni/SiO <sub>2</sub>                                  | 150    | 59                               | 10    | H <sub>2</sub> O                                          | 100       | [17]         |
| 18    | Ni(COD) <sub>2</sub> + SIPr·HCl<br>NaOtBu,           | 120    | 1                                | 16    | <i>m</i> -Xylene                                          | 100       | [18]         |
| 19    | Ni/N-C                                               | 200    | 5                                | 3     | <i>n</i> -Hexane                                          | 100       | [19]         |
| 20    | Co/C@N                                               | 220    | 20                               | 6     | <i>n</i> -Hexane                                          | 100       | [20]         |
| 21    | Co <sub>2</sub> NiO <sub>x</sub> + Nb <sub>2</sub> C | 120    | 5                                | 12    | Isopropanol                                               | >99.0     | This<br>work |

**Table S2.** ICP-OES results of different catalysts. <sup>a</sup>

| Entry | Catalysts                                      | Calculated <sup>a</sup>                        | ICP-OES tested                                    |
|-------|------------------------------------------------|------------------------------------------------|---------------------------------------------------|
| 1     | Co <sub>1</sub> Ni <sub>1</sub> O <sub>x</sub> | Co <sub>1</sub> Ni <sub>1</sub> O <sub>x</sub> | Co <sub>1.06</sub> Ni <sub>1</sub> O <sub>x</sub> |
| 2     | Co <sub>2</sub> Ni <sub>1</sub> O <sub>x</sub> | Co <sub>2</sub> Ni <sub>1</sub> O <sub>x</sub> | Co <sub>2.17</sub> Ni <sub>1</sub> O <sub>x</sub> |
| 3     | Co <sub>3</sub> Ni <sub>1</sub> O <sub>x</sub> | Co <sub>3</sub> Ni <sub>1</sub> O <sub>x</sub> | Co <sub>3.36</sub> Ni <sub>1</sub> O <sub>x</sub> |
| 4     | Co <sub>5</sub> Ni <sub>1</sub> O <sub>x</sub> | Co <sub>5</sub> Ni <sub>1</sub> O <sub>x</sub> | Co <sub>5.21</sub> Ni <sub>1</sub> O <sub>x</sub> |
| 5     | Co <sub>1</sub> Ni <sub>3</sub> O <sub>x</sub> | Co <sub>1</sub> Ni <sub>3</sub> O <sub>x</sub> | Co <sub>1</sub> Ni <sub>3.12</sub> O <sub>x</sub> |
| 6     | Co <sub>1</sub> Ni <sub>5</sub> O <sub>x</sub> | Co <sub>1</sub> Ni <sub>5</sub> O <sub>x</sub> | Co <sub>1</sub> Ni <sub>5.08</sub> O <sub>x</sub> |

<sup>a</sup>Calculated from the feed amount of precursor salts.

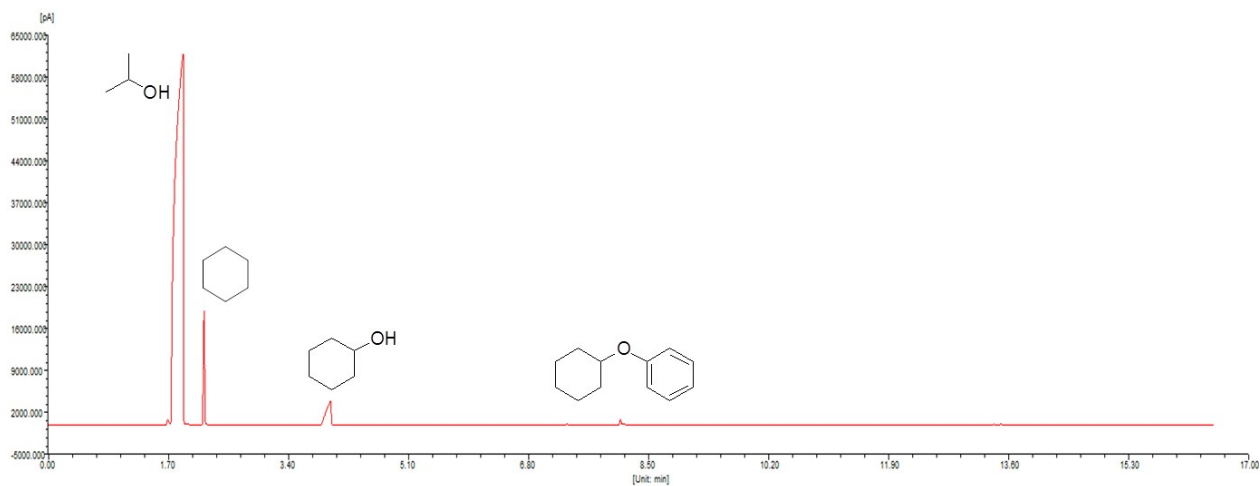

**Figure S1.** GC analysis diagram of hydrogenolysis products of diphenyl ether. (Table 1, entry 5).

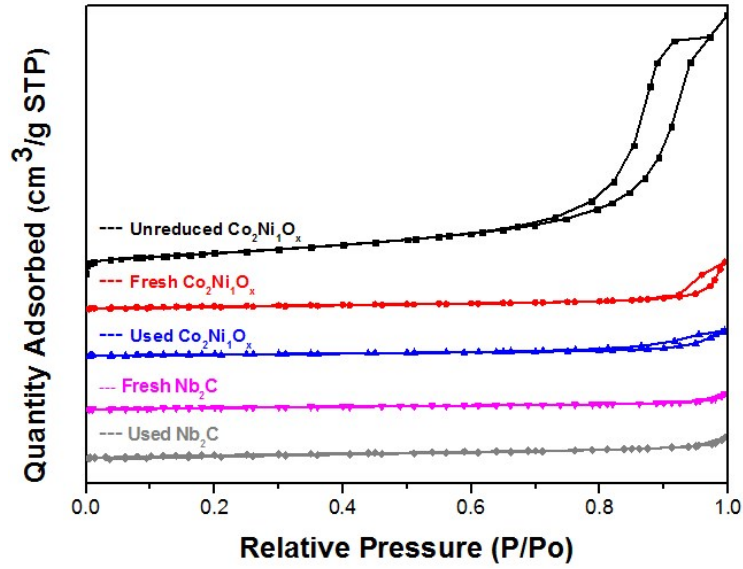

**Figure S2.** N<sub>2</sub> adsorption/desorption isotherms of catalysts.

**Table S3.** The analysis results of N<sub>2</sub> adsorption/desorption isotherms for catalysts.

| Catalysts                                                | BET surface area<br>(m <sup>2</sup> /g) | Pore size (nm) | Pore volume<br>(cm <sup>3</sup> /g) |
|----------------------------------------------------------|-----------------------------------------|----------------|-------------------------------------|
| Unreduced Co <sub>2</sub> Ni <sub>1</sub> O <sub>x</sub> | 69                                      | 14             | 0.22                                |
| Co <sub>2</sub> Ni <sub>1</sub> O <sub>x</sub>           | 12                                      | 16             | 0.04                                |
| Used Co <sub>2</sub> Ni <sub>1</sub> O <sub>x</sub>      | 9                                       | 15             | 0.03                                |
| Nb <sub>2</sub> C MXene                                  | 9                                       | 7              | 0.01                                |
| Used Nb <sub>2</sub> C MXene                             | 11                                      | 12             | 0.02                                |

<sup>a</sup>Obtained from the BJH method.

**Table S4.** Surface elemental concentrations determined by XPS.

| Entry | Catalyst                                               | Co 2p (%)       |                  |                  | Ni 2p (%)       |                  | O 1s (%) |                |     | Co (%) | Ni (%) | O (%) | C (%) |
|-------|--------------------------------------------------------|-----------------|------------------|------------------|-----------------|------------------|----------|----------------|-----|--------|--------|-------|-------|
|       |                                                        | Co <sup>0</sup> | Co <sup>2+</sup> | Co <sup>3+</sup> | Ni <sup>0</sup> | Ni <sup>2+</sup> | O-H      | V <sub>o</sub> | O-M |        |        |       |       |
| 1     | Co <sub>5</sub> Ni <sub>1</sub> O <sub>x</sub>         | 22              | 29               | 49               | 5               | 95               | 45       | 40             | 15  | 27     | 5      | 47    | 21    |
| 2     | Co <sub>2</sub> Ni <sub>1</sub> O <sub>x</sub>         | 18              | 25               | 57               | 14              | 86               | 42       | 46             | 12  | 15     | 7      | 46    | 32    |
| 3     | Co <sub>1</sub> Ni <sub>3</sub> O <sub>x</sub>         | 20              | 28               | 52               | 16              | 84               | 49       | 32             | 19  | 6      | 18     | 42    | 34    |
| 4     | Co <sub>1</sub> Ni <sub>5</sub> O <sub>x</sub>         | 17              | 29               | 54               | 21              | 79               | 42       | 38             | 20  | 4      | 20     | 35    | 41    |
| 5     | Used<br>Co <sub>2</sub> Ni <sub>1</sub> O <sub>x</sub> | 16              | 37               | 48               | 14              | 86               | 46       | 38             | 16  | 13     | 6      | 41    | 40    |

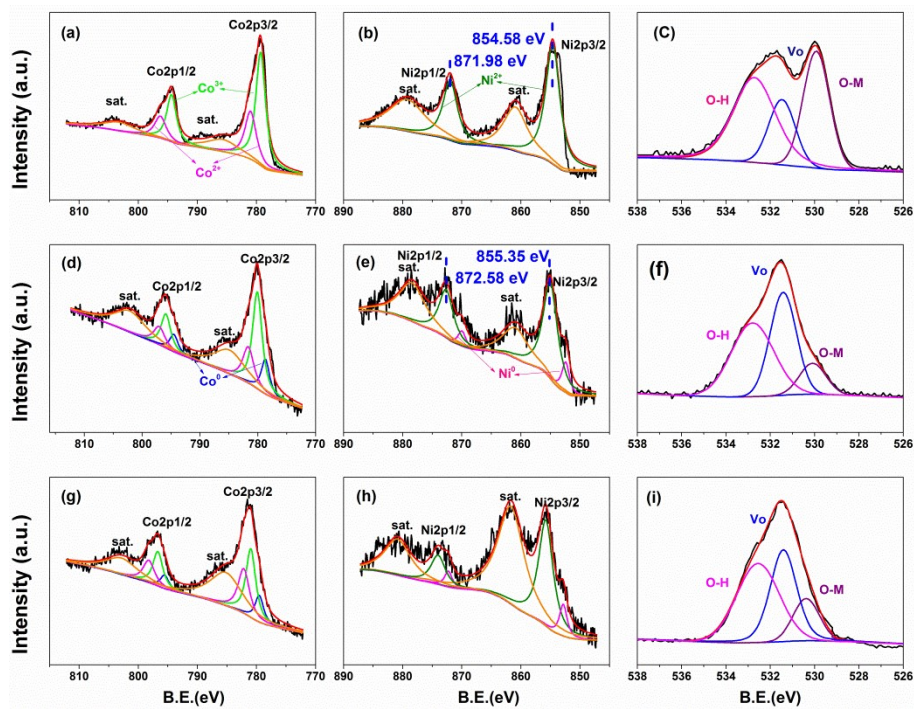

**Figure S3.** XPS spectra of the unreduced  $\text{Co}_2\text{Ni}_1\text{O}_x$  ( a, Co 2p; b, Ni 2p; c, O 1s), the fresh  $\text{Co}_2\text{Ni}_1\text{O}_x$  (d, Co 2p; e, Ni 2p; f, O 1s ), and the used  $\text{Co}_2\text{Ni}_1\text{O}_x$  (g, Co 2p; h, Ni 2p; i, O 1s), respectively.

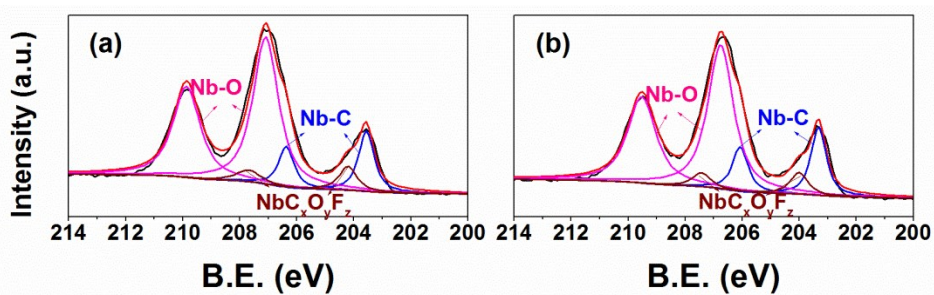

**Figure S4.** XPS spectra of the fresh (a, Nb 3d) and the used (b, Nb 3d)  $\text{Nb}_2\text{C}$  MXene.

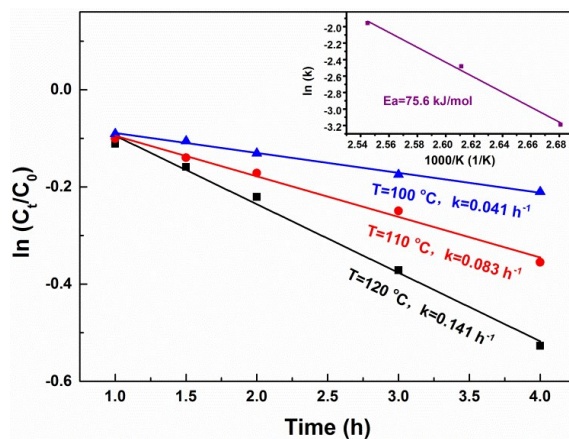

**Figure S5.** Kinetic studies of the hydrogenolysis of DPE. Reaction condition:  $\text{Co}_2\text{Ni}_1\text{O}_x$  20 mg,  $\text{Nb}_2\text{C}$  20 mg, DPE 0.5 mmol, isopropanol 2 mL and  $\text{H}_2$  5 bar.

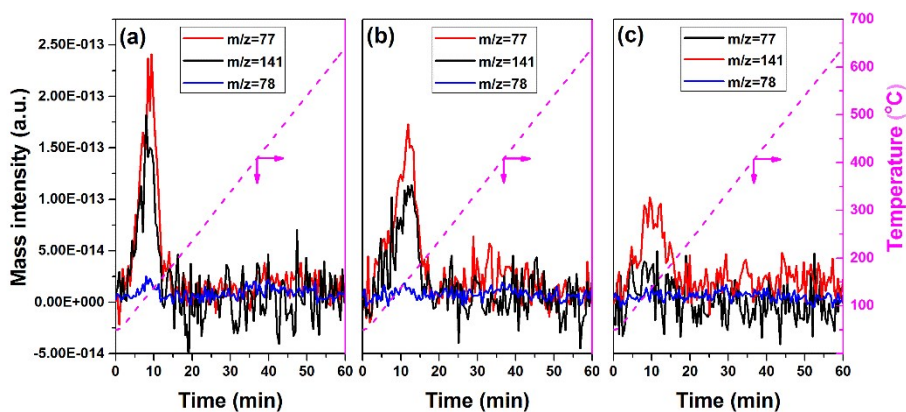

**Figure S6.** The results of DPE-TPD-Mass by using the same amount (a,  $\text{Co}_2\text{Ni}_1\text{O}_x$ ; b,  $\text{Co}_2\text{Ni}_1\text{O}_x+\text{Nb}_2\text{O}_5$ ; c,  $\text{Co}_2\text{Ni}_1\text{O}_x+\text{Nb}_2\text{C}$ ).



## Reference

- [1] S. Yang, X. Lu, H. Yao, J. Xin, J. Xu, Y. Kang, S. Zhang. Efficient hydrodeoxygenation of lignin-derived phenols and dimeric ethers with synergistic [Bmim]PF<sub>6</sub>-Ru/SBA-15 catalysis under acid free conditions. *Green Chem.*, 2019, 21, 597-605.
- [2] H. Wu, J. Song, C. Xie, C. Wu, C. Chen, B. Han. Efficient and Mild Transfer Hydrogenolytic Cleavage of Aromatic Ether Bonds in Lignin-Derived Compounds over Ru/C. *ACS Sustain. Chem. Eng.*, 2018, 6, 2872-2877
- [3] H. Zeng, D. Cao, Z. Qiu, C. Li. Palladium-Catalyzed Formal Cross-Coupling of Diaryl Ethers with Amines: Slicing the 4–O–5 Linkage in Lignin Models. *Angew. Chem. Int. Ed.*, 2018, 57, 3752-3757.
- [4] L. Chen, C. Fink, Z. Fei, P. J. Dyson, G. Laurency. An efficient Pt nanoparticle–ionic liquid system for the hydrodeoxygenation of bio-derived phenols under mild conditions. *Green Chem.*, 2017, 19, 5435-5441.
- [5] C. Zhao, J. A. Lercher. Selective hydrodeoxygenation of lignin-derived phenolic monomers and dimers to cycloalkanes on Pd/C and HZSM-5 catalysts. *ChemCatChem*, 2012, 4, 64-68.
- [6] C. A. Scaldaferrri, P. Warakunwit, V. M. Pasa, D. E. Resasco. C–O cleavage of diphenyl ether followed by C–C coupling reactions over hydrophobized Pd/HY catalysts. *Appl. Catal. B-Environ.*, 2019, 259, 118081.
- [7] M. Wang, O. Y. Gutierrez, D. M. Camaioni, J. A. Lercher. Palladium-catalyzed reductive insertion of alcohols into aryl ether bonds. *Angew. Chem. Int. Ed.*, 2018, 130, 3747-3751.
- [8] M. Guo, J. Peng, Q. Yang, C. Li. Highly active and selective RuPd bimetallic NPs for the cleavage of the diphenyl ether C–O bond. *ACS Catal.*, 2018, 8, 11174-11183.
- [9] S. Bulut, S. Siankevich, A. P. Muyden, D. T. Alexander, G. Savoglidis, J. Zhang, P. J. Dyson. Efficient cleavage of aryl ether C–O linkages by Rh–Ni and Ru–Ni nanoscale catalysts operating in water. *Chem. Sci.*, 2018, 9, 5530-5535.
- [10] H. Xu, K. Wang, H. Zhang, L. Hao, J. Xu, Z. Liu. Ionic liquid modified montmorillonite-supported Ru nanoparticles: highly efficient heterogeneous catalysts for the hydrodeoxygenation of phenolic compounds to cycloalkanes. *Catal. Sci. Technol.*, 2014, 4,

2658-2663.

- [11] H. Konnerth, J. Zhang, D. Ma, M. H. Precht, N. Yan. Base promoted hydrogenolysis of lignin model compounds and organosolv lignin over metal catalysts in water. *Chem. Engin. Sci.*, 2015,123, 155-163.
- [12] F. Mauriello, E. Paone, R. Pietropaolo, A. M. Balu, R. Luque. Catalytic transfer hydrogenolysis of lignin-derived aromatic ethers promoted by bimetallic Pd/Ni systems. *ACS Sustain. Chem. Eng.*, 2018, 6, 9269-9276.
- [13] L. Zhang, Y. Wang, L. Zhang, Z. Chi, S. Wan. Hydrogenolysis of aryl ether bond over heterogeneous co-based catalyst. *Ind. Eng. Chem. Res.*, 2020, 59, 17357-17364.
- [14] L. Zhang, Y. Wang, B. Zhang, S. Wang, J. Lin, Y. Wang. Selective hydrogenolysis of aryl ether bond over Ru-Fe bimetallic catalyst. *Catal. Today*, 2020, . doi:10.1016/j.cattod.2020.04.030.
- [15] M. Zaheer, J. Hermannsdorfer, W. P. Kretschmer, G. Motz, R. Kempe. Robust heterogeneous nickel catalysts with tailored porosity for the selective hydrogenolysis of aryl ethers. *ChemCatchem*, 2014, 6, 91-95.
- [16] V. Stavila, R. Parthasarathi, R. W. Davis, F. E. Gabaly, K. L. Sale, B. A. Simmons, M. D. Allendorf. MOF-based catalysts for selective hydrogenolysis of carbon–oxygen ether bonds. *ACS Catal.*, 2016, 6, 55-59.
- [17] M. Wang, Y. Zhao, D. Mei, R. M. Bullock, O. Y. Gutierrez, D. M. Camaioni, J. A. Lercher. The critical role of reductive steps in the Nickel-catalyzed hydrogenolysis and hydrolysis of aryl ether C–O Bonds. *Angew. Chem. Int. Ed.*, 2020, 59, 1445-1449.
- [18] A. G. Sergeev, J. F. Hartwig. Selective, Nickel-catalyzed hydrogenolysis of aryl ethers. *Science*, 2011, 332, 439-443.
- [19] X. Si, Y. Zhao, Q. Song, J. Cao, R. Wang, X. Wei. Hydrogenolysis of lignin-derived aryl ethers to monomers over a MOF-derived Ni/N–C catalyst. *React. Chem. Eng.*, 2020, 5, 886-895.
- [20] Q. Song, Y. Zhao, F. Wu, G. Li, X. Fan, R. Wang, J. Cao, X. Wei. Selective hydrogenolysis of lignin-derived aryl ethers over Co/C@N Catalysts. *Renew. Energ.*, 2020, 148, 729-738.
